# Supplementary material
Source: MDPI journal article supplement (https://www.mdpi.com/2076-3417/11/15/6965)
Supplement: s1 [file s1 › applsci-1272517-supplementary.pdf]

## *Supplementary Materials*

# **Effect of Shiga toxin on inhomogeneous biological membrane structure determined by small-angle scattering**

Shuyang Tu <sup>1</sup>, Haijiao Zhang <sup>2</sup>, Yawen Li <sup>6, 3</sup>, Yongchao Zhang <sup>3</sup>, Qiang Tian <sup>4</sup>, László Almásy <sup>5</sup>, Xianhui Xu <sup>1</sup>, Rongguang Zhang <sup>2</sup>, Aihua Zou <sup>3, ‡</sup> and Na Li <sup>1, ‡</sup>

<sup>1</sup> National Facility for Protein Science in Shanghai, Zhangjiang Lab, Shanghai Advanced Research Institute, CAS, No.333, Haik Road, Shanghai, 201210, China

<sup>2</sup> State Key Laboratory of Molecular Biology, Shanghai Institute of Biochemistry and Cell Biology, CAS Center for Excellence in Molecular Cell Science, Chinese Academy of Sciences, Shanghai, No.320, Yueyang Road, Shanghai, 200031, China

<sup>3</sup> College of Chemistry and Materials Science, Shanghai Normal University, Shanghai 200234, PR China

<sup>4</sup> State Key Laboratory of Environment-friendly Energy Materials, Southwest University of Science and Technology, Mianyang 621010, China

<sup>5</sup> Institute for Energy Security and Environmental Safety, Centre for Energy Research, Konkoly-Thege Str. 29-33, 1121-Budapest, Hungary

<sup>6</sup> Department of Chemistry, Qilu Normal University, Jinan, Shandong 250013, China

\* These authors contributed equally: Shuyang Tu, Haijiao Zhang and Yawen Li.

‡ Correspondence: Aihua Zou (aihuzou@ecust.edu.cn) and Na Li (nli@sibcb.ac.cn)

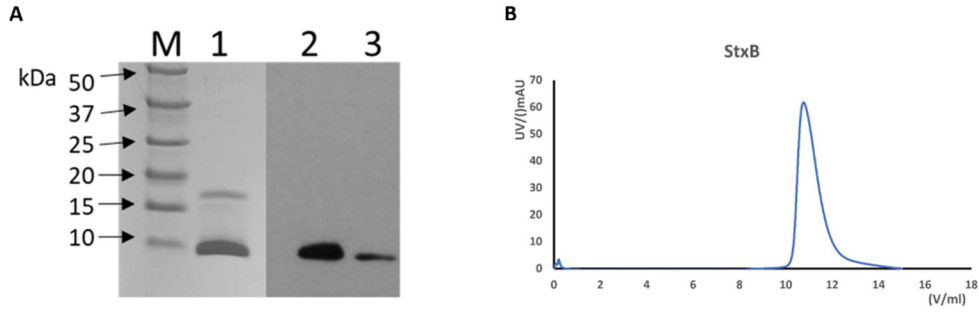

**Figure S1.** Characterization of the purified Shiga toxin B-subunit. A) Tricine-SAS-PAGE (Lanes M-1) and Western-blot analysis (Lanes 2-3) of cytoplasmic extracts of *E. coli* BL21 (DE3) ; B) FPLC profile of Shiga toxin B-subunit.

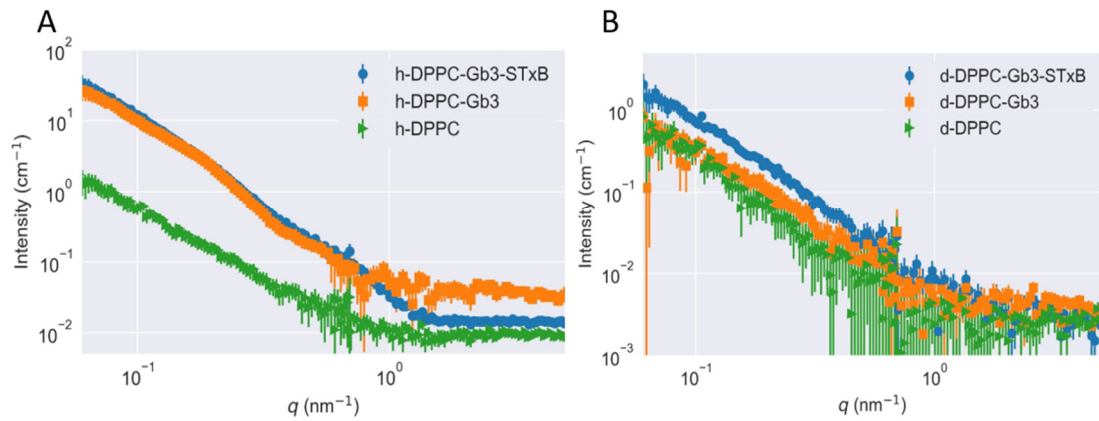

**Figure S2.** Small-angle scattering curves of the SUV samples of Gb3 and DPPC mixture ( $[Gb3]/[DPPC] = 0.1/1$ ) illustrated with error bar. Measurements were performed at  $T = 25^\circ\text{C}$ . (A) small-angle neutron scattering curves of  $[h\text{-DPPC}]/[d\text{-DPPC}] = 1/0$ ; (B) small-angle neutron scattering curves of  $[h\text{-DPPC}]/[d\text{-DPPC}] = 0/1$ .

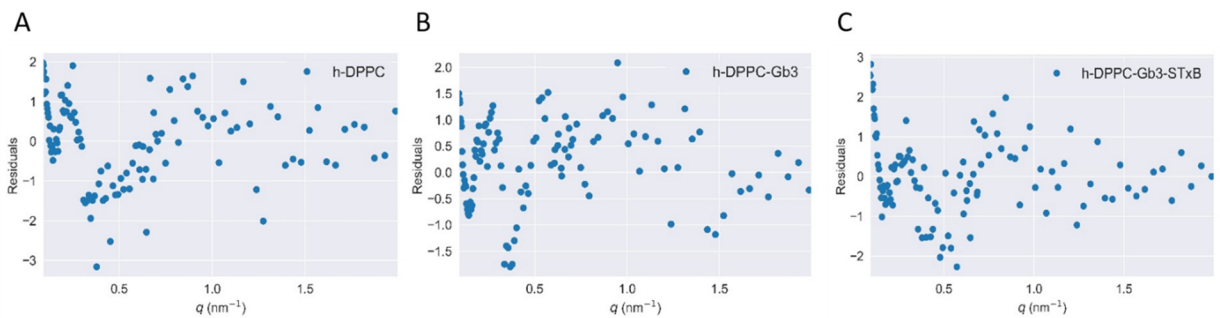

**Figure S3.** Fitting residuals of scattering for the  $[h\text{-DPPC}]/[d\text{-DPPC}] = 1/0$  SUV sample using polydisperse three-shell model. The SUV were prepared as  $[Gb3]/[DPPC] = 0.1/1$ . Measurements were performed at  $T = 25^\circ\text{C}$ . A) Empty DPPC vesicle; B) Gb3 reconstructed DPPC vesicle; C) Shiga toxin B subunit incubated with Gb3 reconstructed DPPC vesicle.

**Table S1.** The overall size parameters of [h-DPPC]/[d-DPPC] = 0/1 SUV vesicle ([Gb3]/[DPPC] = 0.1/1, 1% w/v DPPC in D2O, pH 7.0). Measured by dynamic light scattering.

|         | DPPC<br>(nm) | DPPC-Gb3<br>(nm) | DPPC-Gb3-STxB<br>(nm) |
|---------|--------------|------------------|-----------------------|
| R1      | 66.5         | 71.5             | 69.9                  |
| R2      | 69.7         | 67.9             | 64.1                  |
| R3      | 76.2         | 75.2             | 63.7                  |
| Average | 70.8         | 71.5             | 65.9                  |

**Table S2.** The fitting parameters for scattering data used in model membranes. The reduced chi-square value is listed to prove the fitting fidelity.

|                 | Fitting<br>interval<br>(nm <sup>-1</sup> ) | Thickness of<br>head-group<br>(nm) | Thickness<br>of tail<br>(nm) | Lognormal<br>distribution  |                   | Reduced<br>Chi-<br>square |
|-----------------|--------------------------------------------|------------------------------------|------------------------------|----------------------------|-------------------|---------------------------|
|                 |                                            |                                    |                              | $R_{med}$<br>(nm)<br>fixed | $\sigma$<br>fixed |                           |
| h-DPPC          | 0.09-2                                     | 3.33(5)                            | 0.80(8)                      | 18                         | 0.5               | 1.1                       |
| h-DPPC-Gb3      | 0.09-2                                     | 3.10(13)                           | 0.85(7)                      | 18                         | 0.5               | 0.7                       |
| h-DPPC-Gb3-STxB | 0.09-2                                     | 2.50(15)                           | 1.13(8)                      | 18                         | 0.5               | 1.1                       |

**Table S3.** The fitting parameters for scattering data used in Gb3 microdomains by the model-independent Guinier law for elongated objects with the assumption that the microdomains form elongated aggregates.

|                 | Fitting interval (nm <sup>-1</sup> ) | $R_g$ (nm) | $I_0$ (a.u.) |
|-----------------|--------------------------------------|------------|--------------|
| h-DPPC-Gb3-STxB | 0.06~0.15                            | 7.8(7)     | 0.034(3)     |
| h-DPPC-Gb3      | 0.06~0.20                            | 5.3(7)     | 0.011(1)     |
